1 *Running title:* Energy budget and hibernation in a marsupial

2

3 **A mesocosm experiment in ecological physiology: adaptive modulation of energy**  
4 **budget in a hibernating marsupial under chronic caloric restriction**

5

6 Roberto F. Nespolo<sup>1,2,3\*</sup>, Francisco E. Fontúrbel<sup>4</sup>, Carlos Mejias<sup>2</sup>, Rodrigo Contreras<sup>2</sup>,  
7 Paulina Gutierrez<sup>2</sup>, José Ruiz<sup>2</sup>, Esteban Oda<sup>2</sup>, Pablo Sabat<sup>5</sup>, Catherine Hambly<sup>6</sup>, John R.  
8 Speakman<sup>6,7,8</sup> & Francisco Bozinovic<sup>1</sup>

9

10 <sup>1</sup> Center of Applied Ecology and Sustainability (CAPES), Departamento de Ecología  
11 Facultad de Ciencias Biológicas, Pontificia Universidad Católica de Chile, Santiago, Chile

12 <sup>2</sup> Instituto de Ciencias Ambientales y Evolutivas, Universidad Austral de Chile, Valdivia,  
13 Chile

14 <sup>3</sup> Millennium Institute for Integrative Biology (iBio), Santiago, Chile

15 <sup>4</sup> Instituto de Biología, Pontificia Universidad Católica de Valparaíso, Valparaíso, Chile.  
16 ORCID 0000-0001-8585-2816

17 <sup>5</sup> Departamento de Ciencias Ecológicas, Facultad de Ciencias, Universidad de Chile,  
18 Santiago, Chile. ORCID 0000-0002-6609-9969

19 <sup>6</sup> Institute of Biological and Environmental Sciences, University of Aberdeen, Aberdeen,  
20 AB24 2TZ, UK

21 <sup>7</sup> State Key Laboratory of Molecular Developmental Biology, Institute of Genetics and  
22 Developmental Biology, Chinese Academy of Sciences, Beijing, 100101, China

23 <sup>8</sup> Chinese Academy of Sciences Center of Excellence in Animal Evolution and Genetics,  
24 Kunming, China

25 \* *Corresponding author:* [robertonespolo@uach.cl](mailto:robertonespolo@uach.cl)

26

27 **Acknowledgements.** This work was funded by FONDECYT grant 1180917 to RFN, ANID  
28 PIA/BASAL FB0002 to FB, RFN and PS. We also thank Enrico Rezende for a critical review  
29 of the manuscript.

30 **Author contributions.** RFN conceived the study, designed and wrote the first draft of the  
31 manuscript. FEF, FB and PS contributed in the design, statistical analysis and manuscript

32 editions. RC, PG, JR and EO contributed with field and laboratory work. CM prepared the  
33 figures. CH and JS contributed with DLW analysis and measures, and with editions.  
34 **Data availability statement.** All data will be available from figshare digital repository upon  
35 acceptance.

36 **Abstract**

37 During the last sixty years, mammalian hibernation (i.e., seasonal torpor) has been interpreted  
38 as a physiological adaptation for energy economy. However -and crucially for validating this  
39 idea - direct field comparisons of energy expenditure in hibernating and active free-ranging  
40 animals are scarce. Using replicated mesocosms and a combination of energy budgeting  
41 approaches (i.e., doubly labelled water, rates of CO<sub>2</sub> production and food intake), we  
42 experimentally manipulated energy availability and quantified net energy costs of  
43 hibernation in a marsupial. We hypothesized that, when facing chronic caloric restriction  
44 (CCR), a hibernator should maximize torpor use for compensating the energetic deficit,  
45 compared to *ad libitum* fed individuals (=controls). However, intensifying torpor duration at  
46 low temperatures could increase other burdens (e.g., cost of rewarming, freezing risk). In  
47 order to explore this trade-off, we followed the complete hibernation cycle of the relict  
48 marsupial *Dromiciops gliroides*, and estimated its total energy requirements, and compared  
49 this with a control condition. Our results revealed: (1) that energy restricted animals, instead  
50 of promoting heat conservation strategies during hibernation (e.g., social clustering and  
51 thermoregulation), maximized torpor use and saved just enough energy to cover the deficit,  
52 and (2) that hibernation represents a net energy saving of 51% compared with animals that  
53 remained active. This work provides compelling evidence of a fine-tuning use of hibernation  
54 in response to food availability and presents the first direct estimation of energy savings by  
55 hibernation encompassing the total hibernation cycle.

56

57 **Key words:** behavioral thermoregulation, chronic caloric restriction, daily energy  
58 expenditure, doubly labelled water, energy budget, hibernation, marsupial, social  
59 clustering.

## 60 **Introduction**

61 The countless ways natural selection shapes organismal design and function has always  
62 intrigued biologists, particularly in ecosystems where energy availability is diluted,  
63 temporally or spatially variable (Mueller and Diamond 2001, Ferguson 2002, Nie et al. 2015).  
64 In this scenario, energy flow is often explained by the allocation principle, where energy  
65 from food passes through several sequential bottlenecks (e.g., foraging, digestion,  
66 assimilation), and must be allocated to different functions in parallel (e.g., growth,  
67 maintenance, and reproduction) (Weiner 1992). From this perspective, nature's economy  
68 would be defined by austerity, for which ectotherms provide the best fit to the rule, as they  
69 minimize maintenance costs when activity is low (Pough 1980, Artacho and Nespolo 2009).  
70 Endotherms (birds and mammals) on the opposite have a wasteful lifestyle, a counter-  
71 intuitive solution for any idea of nature's economy (an "extravagant economy" *sensu* (Hayes  
72 and Garland 1995, Koteja 2004). However, some endotherms experience transient periods of  
73 ectothermy or torpor (=heterothermy, hereafter), as putative adaptations to seasonal or  
74 unpredictable reductions in environmental productivity. For the case of hibernation (i.e.,  
75 seasonal multi-day episodes of torpor)(Geiser and Ruf 1995b), animals experience drops in  
76 body temperature and a general reduction in metabolism lasting several days or weeks, where  
77 body temperature is maintained a few degrees above ambient temperature. During these  
78 episodes, maintenance costs fall to a fraction of normal values, with significant energy  
79 savings (Geiser 2004), a "logical" solution for animals that cannot migrate to better  
80 environments (Schmidt-Nielsen 1979). Thus, hibernators would have the long-term benefits  
81 of endothermy, together with the short-term benefits of ectothermy.

82 Contrarily with daily torpor, where metabolic depression occurs during a few hours,  
83 hibernation is characterized by torpor events that increase in duration and frequency as the  
84 cold season progresses {Geiser, 2013 #10429}. Thus, animals modulate the frequency of  
85 such events depending on the cold, photoperiod and the amount of fat reserves, the latter  
86 being determinant on predicting hibernation survival (Humphries et al. 2002, Humphries et  
87 al. 2003a, Humphries et al. 2003b). But how much energy, exactly, is saved during a  
88 complete hibernation cycle, compared to a situation without hibernation? Do hibernating  
89 animals regulate torpor frequency "wisely" as food availability varies? Although hundreds  
90 of laboratory experiments have provided partial answers to these questions, only a handful

91 of experimental manipulations of food availability have demonstrated a link between energy  
92 availability, torpor frequency and fat reserves in hibernation (reviewed in (Vuarin and Henry  
93 2014).

94 According to Boyles et al. (Boyles et al. 2020), to compensate for reduced energy  
95 availability, a hibernator that perceives an energetic bottleneck in the environment should  
96 experience longer and deeper torpor bouts and select sites with low temperatures for  
97 hibernating (Song et al. 2000). However, this has a limit imposed by several costs (e.g.,  
98 prolonged inactivity, freezing mortality, decreasing immune function and sleep deprivation,  
99 see Humphries et al. 2003b, Boyles et al. 2020), which furnishes a “hibernation trade-off”  
100 where an optimum (minimum) hibernation temperature is defined {Humphries, 2002  
101 #10368}. Above this temperature, energy saved by hibernation is maximized and below this  
102 temperature, hibernation costs are maximized. In nature, a range of responses have been  
103 observed. For instance, passerine birds (Wojciechowski et al. 2011, Douglas et al. 2017),  
104 mice (Eto et al. 2015) and Siberian hamsters (Jefimow et al. 2011) minimize heat loss during  
105 daily torpor, whereas non-migrating bats (Ryan et al. 2019) and sugar gliders (Nowack and  
106 Geiser 2016) minimize body temperature during multi-day hibernation.

107 Here we explored the hibernation trade-off on the social Microbiotheriid marsupial  
108 *Dromiciops gliroides* (Hershkovitz 1999) using a mesocosm setup for tracking animals  
109 during a complete hibernation cycle. Specifically, we manipulated food by applying a chronic  
110 caloric restriction treatment (CCR) and we measured total energy requirements for wintering  
111 using gross energy intake (=daily food consumption) and CO<sub>2</sub> production, using the doubly  
112 labelled method. Specifically, we predicted that CCR animals (compared with ad libitum fed  
113 animals) will either intensify torpor use in order to maximize energy savings and compensate  
114 for the energy restriction they will avoid risks by using heat conservation strategies (e.g.,  
115 social clustering and hibernacula use).

116

## 117 **Methods**

### 118 *Animals*

119 *Dromiciops gliroides* (Thomas 1894) is the only living species of Microbiotheria; the  
120 ancestral group of Australian marsupials. *D. gliroides* is a small arboreal marsupial inhabiting  
121 the temperate rainforests of southern South America, living in native forest stands dominated

122 by *Nothofagus* spp. and *Araucaria araucana* trees (HersHKovitz 1999, Fonturbel et al. 2012).  
123 This marsupial is known to be the sole disperser of several endemic plant species, thus being  
124 intimately associated with the temperate rainforest (Amico et al. 2009), where this  
125 experiment was performed. We installed the mesocosm in Estación Experimental Fundo San  
126 Martín (SM), a property of Universidad Austral de Chile (39° 41'S 73° 18'W), which is  
127 within the typical habitat of *Dromiciops gliroides*. In this paper we refer to “hibernation” as  
128 the multiday torpor bouts lasting several days, in contrast to daily heterotherms that  
129 experiences torpor bouts of 3-12 hours (Geiser and Ruf 1995a). No previous monitoring of  
130 the whole hibernation period of *D. gliroides* is available, which was estimated to extend from  
131 May to September (HersHKovitz 1999, Muñoz-Pedrerros et al. 2005). Thus, we started the  
132 experiment in April, and finished data gathering in December. We captured 40 individuals  
133 from different sites within SM during the austral summer, which were live-captured  
134 using Tomahawk-like traps baited with banana and attached to the trees, 2 m above the  
135 ground (Fonturbel 2010). Traps were located 300 m apart from the enclosure site, in four  
136 different patches of forest, each on a sampling grid. Each individual was marked using PIT-  
137 tag (BTS-ID, Sweden) subcutaneous mark, and transported to the laboratory immediately  
138 after capture for feeding and rehydration.

139

#### 140 *Outdoor enclosures*

141 To characterize simultaneously physiological and thermoregulatory responses of  
142 hibernating *D. gliroides*, we built eight cylindric enclosures (Fig. 1), which were distributed  
143 within the forest and separated about 5 m from each other, covering a total area of about 80  
144 m<sup>2</sup> (see Supplementary Material). Each enclosure had a internal volume of 2 m<sup>3</sup>, and was  
145 manufactured in zinc with a large 1.8m-diameter cylinder buried 10 cm in the ground, which  
146 gave a 0.8 m height above ground. Each enclosure had a data logger installed for continuous  
147 measurement of air temperature (HOBO ®). Initially, four enclosures were assigned to a  
148 control treatment (“control”, hereafter) and the other four were assigned to a caloric  
149 restriction treatment (“CCR”, hereafter; see below). Five unrelated animals (i.e., from  
150 different sites to avoid kinship effects) (Franco et al. 2011) were released in each enclosure,  
151 on April 1<sup>st</sup> (autumn). Unfortunately, one of the CCR enclosures was destroyed by a tree

152 falling during winter (animals escaped), which left us with an unbalanced design with 35  
153 animals across 7 enclosures (4 controls and 3 CCR).

154

#### 155 *Experimental energy manipulation*

156 To explore how constant food shortage induce compensatory responses during  
157 hibernation, we applied a chronic caloric restriction treatment to three enclosures. Then, we  
158 offered the equivalent of 165 kJ ind<sup>-1</sup>d<sup>-1</sup> for the control enclosures and provided to the CCR  
159 animals, 60% of this value (95 kJ ind<sup>-1</sup>d<sup>-1</sup>). The food was provided in equal volumes every  
160 day, but once a week we provided a fresh weighed amount ( $\pm 0.01$  g) to each enclosure and  
161 weighed the fresh weight of the leftovers for drying to constant weight (60°C). With this, we  
162 estimated the water content of the diets for estimating average energy intake. Using weekly  
163 values of energy consumption, we calculated the (per capita) total hibernation energy  
164 requirements (kJ per individual).

165

#### 166 *Torpor thermoregulation and daily energy expenditure*

167 Weekly, we took digital thermographic images to clustered torpid individuals in order to  
168 estimate the thermal differential between animals and substrate and to relate this to the caloric  
169 restriction treatment (Fig 1a). We also recorded cluster sizes and whether animals were  
170 within or outside the hibernaculum (see Supplementary Material). To determine direct daily  
171 energy expenditure (DEE, kJ/day), we applied the doubly labelled water technique (Lifson  
172 and McClintock 1966, Butler et al. 2004)(see Supplementary Material) on 24 captive  
173 individuals before the release on enclosures (week zero, in summer, indicated in Fig 2a), we  
174 successfully repeated these determinations in 16 animals at week 18 of the experiment (late  
175 winter; eight individuals from the CCR treatment and eight from the control treatment), thus  
176 giving an average DEE for 48 hours. Basal metabolic rate (BMR) was determined from the  
177 rate of CO<sub>2</sub> production in these same animals measured in the laboratory using standard  
178 respirometry techniques (Nespolo et al. 2010, Contreras et al. 2014).

179

#### 180 *Statistical analysis*

181 We used a combination of generalized linear mixed models and standard parametric analyses  
182 such as ANCOVA, ANOVA and linear regressions when justified. Detailed descriptions of  
183 statistical analyses are provided in Supplementary Material.

184 All procedures presented in this study were approved by the Chilean Agriculture and  
185 Livestock Bureau (SAG) permits No 4371/2019 and 3393/2019, and by the Bioethics  
186 Committee of the Austral University of Chile, resolution 313/2018 annex 2019.

187

## 188 **Results**

189 The main outcome of this experiment supports the idea that hibernating *D. gliroides*  
190 modulated torpor use for saving energy and cover the energetic deficit imposed by caloric  
191 restriction (results summarized in Fig. 2 and Supplementary Table 2). Indeed, animals under  
192 CCR (n= 15) consumed similar amounts of food as controls initially, but approximately at  
193 the eleventh week they consumed significantly less food than controls (n=20)(Fig 2b). CCR  
194 animals did not prefer to cluster in larger groups or use hibernacula for heat maintenance,  
195 and no statistical differences in any thermoregulatory aspect of the comparison of CCR and  
196 controls groups were observed (see Figs S2 and S3 in Supplementary Material). Moreover,  
197 those individuals experienced a constant reduction of body mass ( $M_B$ ); to become significant  
198 at the 20<sup>th</sup> week (Fig. 2a). At week 23, however, CCR animals started to recover  $M_B$  and  
199 were not significantly different from controls by week 25 (two-tailed t-tests,  $p < 0.001$ ; Fig.  
200 2a), thus suggesting that they, without access to extra food, managed their energy budget  
201 more efficiently. This is confirmed by measurements of per-capita energy consumption,  
202 which shows CCR animals consistently ingested less food than controls, until the rise in  
203 ambient temperatures during the austral spring (Fig. 2b-c). Then, energy intake became  
204 significantly higher in control individuals compared to CCR individuals at week 10 until  
205 week 24 (two-tailed t-tests,  $p < 0.01$ ; Fig 2b). This is explained by a higher incidence in  
206 torpor use in CCR animals compared to controls, a difference that was the largest during  
207 August, which suggests that the main trigger of torpor was body condition rather than  
208 immediate food availability (Fig. 2c). Control animals attained a maximum weight loss of  
209  $13.2 \pm 5.1\%$  (mean  $\pm$  sem) by week 19, whereas CCR animals reached a weigh loss of  $34.8$   
210  $\pm 3.1\%$  by week 20. Also, daily energy intake was significantly correlated with air  
211 temperature in CCR animals ( $p < 0.01$ ,  $n=432$ ) whereas this correlation was non-significant



212 for control animals ( $p=0.08$ ,  $n=652$ ; Fig 3). Thus, although CCR animals had access to 95 kJ  
213  $\text{ind}^{-1}$  per day, they reduced energy consumption to about half of this value ( $=47.7 \pm 3.9$  kJ  
214  $\text{day}^{-1} \text{ind}^{-1}$ , week 8-18,  $n=3$  enclosures), which was significantly lower than that in controls  
215 ( $96.7 \pm 7.3$  kJ  $\text{day}^{-1} \text{ind}^{-1}$ , week 8-18,  $n=4$  enclosures) ( $p \ll 0.001$ , t-test). This allowed them  
216 to reduce total winter energy requirements (i.e., per capita,  $E_w$ ) to 46% of the controls  
217 (control:  $E_w = 10,066 \pm 593.9$  kJ  $\text{ind}^{-1}$ ,  $n=4$  enclosures; CCR:  $E_w = 4,583.8 \pm 113.6$  kJ  $\text{ind}^{-1}$ ,  
218  $n=3$  enclosures;  $p \ll 0.001$ , t-test).

219 During the winter period (i.e., between weeks 8 to 18), animals exhibited an  
220 approximately constant negative slope in body mass (see Fig 2a). On average, each animal  
221 lost 3.0g (control) and 5.5g (CCR) in 70 days (i.e., 0.042 and 0.079 g  $\text{day}^{-1} \text{ind}^{-1}$ , respectively),  
222 which can be assumed to be 60% body fat (Mitchell et al. 2015). Thus, with an energy content  
223 of 39.7 kJ  $\text{g}^{-1}$  for fat (Walsberg and Wolf 1995), this gives 1.0 and 1.9 kJ  $\text{day}^{-1} \text{ind}^{-1}$ , for each  
224 condition respectively. Thus, daily energy expenditure from food and body fat consumption  
225 can then be calculated as  $DEE = E_w + E_{FAT}$  in each case (being  $DEE_{CONTROL} = E_{w-control} +$   
226  $E_{FATcontrol}$  and  $DEE_{CCR} = E_{w-ccr} + E_{FATccr}$ ). This gives:  $DEE_{CONTROL} = 98.6$  kJ  $\text{day}^{-1} \text{ind}^{-1}$  and  
227  $DEE_{CCR} = 48.7$  kJ  $\text{day}^{-1} \text{ind}^{-1}$ . Thus, control animals, which were active at the moment of  
228 sampling, spent on average twice the amount of energy of CCR animals, which were in deep  
229 torpor.

230 The doubly labelled water measurements show that summer animals had a DEE of  
231  $44.9 \pm 2.2$  kJ  $\text{day}^{-1} \text{ind}^{-1}$  ( $n=24$ ) which is 58% of the expected DEE for mammals (Nagy 2005).  
232 This increased significantly in winter to  $47.3 \pm 5.6$  kJ  $\text{day}^{-1} \text{ind}^{-1}$  ( $n=8$ ) (82% of the expected  
233 value) in CCR animals and  $88.0 \pm 5.8$  kJ  $\text{day}^{-1} \text{ind}^{-1}$  ( $n=8$ ) in controls (117% of the expected  
234 value) ( $F_{1,11}=8.92$ ,  $P=0.012$ , ANCOVA)(Fig 4a). There were no significant differences in  
235 basal metabolic rate (BMR) across seasons and treatments (Fig 4b), but the factorial scope  
236 for DEE (DEE/BMR), a measure of the aerobic work capacity, resulted significantly different  
237 across seasons and treatments, where in winter control animals had 62% higher value  
238 compared with CCR animals ( $6.45 \pm 0.58$  over  $4.04 \pm 0.45$ , Fig 4c;  $F_{1,11}=5.37$ ,  $P=0.040$ ,  
239 ANOVA)(Fig 4c). Body mass was significantly reduced in CCR animals by 70% during  
240 winter compared with their summer values, whereas control individuals did not show  
241 seasonal differences (Fig 4d). Summer (pooled: control and CCRs) DEEs were significantly  
242 correlated with body mass ( $R^2=0.61$ ,  $P=0.039$ ,  $n=24$ , Fig 4d-e), which was maintained in

243 winter, with a difference in intercepts between control and CCR animals (Fig 4f,  $F_{1,13}=8.32$ ,  
244  $P=0.013$ , ANCOVA).

245

## 246 **Discussion**

247 Several authors have calculated the amount of energy saved by specific sections of  
248 the hibernation cycle, frequently in a single torpor-arousal cycle and sometimes during  
249 multiple events (Geiser 1988, Holloway and Geiser 1995, Schmid and Speakman 2000,  
250 Bozinovic et al. 2007, Nespolo et al. 2010, Geiser 2013). These values vary from 99% in  
251 single torpor bouts compared with normothermic values, to 15% for multi-day torpor bouts  
252 in some hibernators, including the costs of arousals (Wang 1978, Geiser 2004, 2013).  
253 However, establishing the precise impact of hibernation on the energy budget of free ranging  
254 animals is especially difficult, since a control condition (i.e., a situation without hibernation,  
255 keeping all else equal) is hard to obtain. To the best of our knowledge, this has been  
256 calculated indirectly on laboratory animals, once in eutherians, the Richardson's ground  
257 squirrel (*Urocitellus richardsonii*, (Wang 1978) and once in a marsupial, in pygmy-possum  
258 (*Cercartetus nannus*; (Geiser 2007). Both estimations indicate enormous energy savings by  
259 hibernation: 87.7% and 97.5%, respectively, after comparing hibernation energy expenditure  
260 with the predicted metabolism of active animals. Our results of daily energy expenditure  
261 (DEE) in energy restricted animals and controls provide a direct estimation of this value, with  
262 the caveat that during the coldest months (July-October) on average only 69% of CCR  
263 animals were in torpor and 25% of controls were in a similar condition. However, these  
264 values coincide well with the doubly labelled water method (DLW) estimations, for which  
265 all CCR animals were torpid at the moment of sampling, and all control animals were active  
266 at this moment. Recalling from Results,  $DEE_{CONTROL-FOOD} = 98.6 \text{ kJ day}^{-1}\text{ind}^{-1}$  and  
267  $DEE_{CONTROL-DLW} = 88.0 \text{ kJ day}^{-1}\text{ind}^{-1}$ , and averaging, gives  $DEE_{CONTROL} = 93.3 \text{ kJ day}^{-1}\text{ind}^{-1}$ .  
268 On the other hand,  $DEE_{CCR-FOOD} = 48.7 \text{ kJ day}^{-1}\text{ind}^{-1}$  and  $DEE_{CCR-DLW} = 47.3 \text{ kJ day}^{-1}\text{ind}^{-1}$ ,  
269 gives an average  $DEE_{HIBERNATION} = 48.0 \text{ kJ day}^{-1}\text{ind}^{-1}$ . This reveals a net hibernation  
270 savings of 51.4% ( $=DEE_{HIBERNATION} / DEE_{CONTROL}$ ). This smaller value, compared with  
271 Belding's ground squirrel and pigmy possums can be explained by the fact that our  
272 *Dromiciops* were experiencing outdoor/field conditions, which includes the thermal impact  
273 of natural thermal variations and spontaneous activity bursts during interbout arousals.

274 According to Humphries et al. (2002)(Humphries et al. 2002) (see also: (French  
275 1985), fat reserves predict wintering hibernation survival, because when “the size of the  
276 reserve is less than the rate of depletion times the length of the winter, the hibernator will not  
277 survive”. This assertion is true assuming that animals don’t ingest food during hibernation  
278 (but see Fig 3). Without eating, a hibernating *D. gliroides* spending  $48 \text{ kJ day}^{-1} \text{ ind}^{-1}$  will  
279 need 4,320 grams of fat to survive a winter of 90 days (energy content of fat:  $39.7 \text{ kJg}^{-1}$ )  
280 <sup>1</sup>(Walsberg and Wolf 1995), which is unrealistic for a 40g animal. It is clear then, that  
281 animals regulate food ingestion during interbout arousals, in some way “calculating” torpor  
282 incidence for energy management.

283 Basal metabolic rate (BMR), which is one of the most measured variable in  
284 physiological ecology, representing maintenance costs in endotherms (Konarzewski and  
285 Diamond 1995, Ricklefs et al. 1996, White and Seymour 2003, McKechnie et al. 2006,  
286 Clarke et al. 2010), surprisingly did not vary between seasons or treatments. Instead, the  
287 scope for aerobic activity (DEE/BMR), a measure of how hard animals are working when  
288 active, showed a significant 89% increase from summer to winter in control animals, but a  
289 modest 37.9% increase in CCR animals (from Fig 4d). Thus, CCR animals, in addition of  
290 saving energy by hibernation maintained a lower aerobic capacity probably by reducing the  
291 amount of metabolically active tissues (Bozinovic et al. 1990, Campbell and MacArthur  
292 1998, Nespolo et al. 2002).

293 Mueller and Diamond (2001)(Mueller and Diamond 2001) postulated food  
294 availability (or net primary productivity) as a unifying factor for explaining adaptive  
295 variation in energy expenditure across species, ecosystems, latitude, temperature or rainfall.  
296 This idea is related to the more general “pace-of-life” theory of metabolism and life histories,  
297 which proposes that populations evolving for a long time at low productivity also evolve low  
298 levels of energy expenditure (Wikelski et al. 2003, Careau et al. 2010, Le Galliard et al. 2013,  
299 Londono et al. 2015, Pettersen et al. 2016). Our results support the idea that hibernation  
300 represents a “pace-of-life” adaptation to environments characterized by seasonal reductions  
301 of primary productivity (i.e., characteristics of temperate regions), where hibernation acts a  
302 physiologically regulated metabolic switch-off coupled with the period of low primary  
303 productivity (winter){Turbill, 2011 #3341}. In this sense, the fact that hibernation is present  
304 in several unrelated species living in the same environments supports the view of hibernation

305 as a convergent feature of mammals (Boyles et al. 2013). In fact, *D. gliroides*, the only South  
306 American (SA) mammal described as a hibernator (Bozinovic et al. 2004), has a distribution  
307 range in South America between 35° and 45° S, a narrow latitudinal strip that in the Southern  
308 hemisphere includes a few landmasses (the tip of South Africa, Southern Australia including  
309 Tasmania and most part of New Zealand). This contrasts with the vast extensions of  
310 territories included in this range at the Northern hemisphere, from which almost all  
311 hibernating species have been identified (Humphries et al. 2002, Boyles et al. 2008, Ruf and  
312 Geiser 2015). Perhaps the right terrestrial environment at the Southern hemisphere simply  
313 did not provide enough land area for hibernation to evolve more frequently.

314 Mesocosm studies (i.e., outdoor experiments examining natural environments under  
315 controlled conditions) provide a fundamental link between field surveys and laboratory  
316 experiments (Kennedy 1995, Verdier et al. 2014, Kurz et al. 2017, Maugendre et al. 2017,  
317 Scharfenberger et al. 2019). However, they are particularly scarce in ecological physiology  
318 (however, see references (Merritt et al. 2001, Levy et al. 2012, Gao et al. 2015), a field with  
319 a long tradition on laboratory work (see ref (Humphries et al. 2003b) and cited references).  
320 We encourage more of such experiments. Researchers will surprise how simple and cost-  
321 effective they are, as one single long-term experiment could replace many small laboratory  
322 trials.

323

## 324 **Cited references**

325

326 Amico, G. C., M. A. Rodriguez-Cabal, and M. A. Aizen. 2009. The potential key seed-  
327 dispersing role of the arboreal marsupial *Dromiciops gliroides*. *Acta Oecologica-*  
328 *International Journal of Ecology* **35**:8-13.

329 Artacho, P., and R. F. Nespolo. 2009. NATURAL SELECTION REDUCES ENERGY  
330 METABOLISM IN THE GARDEN SNAIL, *HELIX ASPERSA* (*CORNU*  
331 *ASPERSUM*). *Evolution* **63**:1044-1050.

332 Bates, B., M. Maechler, and B. Bolker. 2013. lme4: Linear mixed-effects models using S4  
333 classes. . R package version 0.999375-39, [http://CRAN.R-](http://CRAN.R-project.org/package=lme4)  
334 [project.org/package=lme4](http://CRAN.R-project.org/package=lme4).

335 Beckerman, A. P., D. Z. Childs, and O. L. Petchey. 2017. *Getting Started with R: An*  
336 *Introduction for Biologists*, 2nd Edition. Oxford Univ Press, New York.

- 337 Berman, E. S. F., S. L. Fortson, S. P. Snaith, M. Gupta, D. S. Baer, I. Chery, S. Blanc, E. L.  
338 Melanson, P. J. Thomson, and J. R. Speakman. 2012. Direct Analysis of delta H-2  
339 and delta O-18 in Natural and Enriched Human Urine Using Laser-Based, Off-Axis  
340 Integrated Cavity Output Spectroscopy. *Analytical Chemistry* **84**:9768-9773.
- 341 Boyles, J. G., J. S. Johnson, A. Blomberg, and T. M. Lilley. 2020. Optimal hibernation  
342 theory. *Mammal Review* **50**:91-100.
- 343 Boyles, J. G., J. J. Storm, and V. Brack. 2008. Thermal benefits of clustering during  
344 hibernation: a field test of competing hypotheses on *Myotis sodalis*. *Functional*  
345 *Ecology* **22**:632-636.
- 346 Boyles, J. G., A. B. Thompson, A. E. McKechnie, E. Malan, M. M. Humphries, and V.  
347 Careau. 2013. A global heterothermic continuum in mammals. *Global Ecology and*  
348 *Biogeography* **22**:1029-1039.
- 349 Bozinovic, F., J. L. P. Munoz, D. E. Naya, and A. P. Cruz-Neto. 2007. Adjusting energy  
350 expenditures to energy supply: food availability regulates torpor use and organ size  
351 in the Chilean mouse-opossum *Thylamys elegans*. *Journal of Comparative*  
352 *Physiology B-Biochemical Systemic and Environmental Physiology* **177**:393-400.
- 353 Bozinovic, F., F. Novoa, and C. Veloso. 1990. Seasonal changes in energy expenditure and  
354 digestive tract of *Abrothrix andinus* (Cricetidae) in the Andes Range. *Physiological*  
355 *Zoology* **63**:1216-1231.
- 356 Bozinovic, F., G. Ruiz, and M. Rosenmann. 2004. Energetics and torpor of a South  
357 American "living fossil", the microbiotheriid *Dromiciops gliroides*. *Journal of*  
358 *Comparative Physiology B-Biochemical Systemic and Environmental Physiology*  
359 **174**:293-297.
- 360 Butler, P. J., J. A. Green, I. L. Boyd, and J. R. Speakman. 2004. Measuring metabolic rate  
361 in the field: the pros and cons of the doubly labelled water and heart rate methods.  
362 *Functional Ecology* **18**:168-183.
- 363 Campbell, K. L., and R. A. MacArthur. 1998. Nutrition and the energetic tactics of  
364 muskrats (*Ondatra zibethicus*): morphological and metabolic adjustments to  
365 seasonal shifts in diet quality. *Canadian Journal of Zoology* **76**:163-174.
- 366 Canals, M., M. Rosenmann, and F. Bozinovic. 1989. Energetics and geometry of huddling  
367 in small mammals. *Journal of Theoretical Biology* **141**:181-189.

- 368 Careau, V., D. Reale, M. M. Humphries, and D. W. Thomas. 2010. The Pace of Life under  
369 Artificial Selection: Personality, Energy Expenditure, and Longevity Are Correlated  
370 in Domestic Dogs. *American Naturalist* **175**:753-758.
- 371 Clarke, A., P. Rothery, and N. J. B. Isaac. 2010. Scaling of basal metabolic rate with body  
372 mass and temperature in mammals. *Journal of Animal Ecology* **79**:610-619.
- 373 Contreras, C., M. Franco, N. J. Place, and R. F. Nespolo. 2014. The effects of poly-  
374 unsaturated fatty acids on the physiology of hibernation in a South American  
375 marsupial, *Dromiciops gliroides*. *Comparative Biochemistry and Physiology a-  
376 Molecular & Integrative Physiology* **177**:62-69.
- 377 Cortes, P. A., M. Franco, P. Sabat, S. A. Quijano, and R. F. Nespolo. 2011. Bioenergetics  
378 and intestinal phenotypic flexibility in the microbiotherid marsupial (*Dromiciops  
379 gliroides*) from the temperate forest in South America. *Comparative Biochemistry  
380 and Physiology a-Molecular & Integrative Physiology* **160**:117-124.
- 381 Dausmann, K. H., and J. Glos. 2015. No energetic benefits from sociality in tropical  
382 hibernation. *Functional Ecology* **29**:498-505.
- 383 Douglas, T. K., C. E. Cooper, and P. C. Withers. 2017. Avian torpor or alternative  
384 thermoregulatory strategies for overwintering? *Journal of Experimental Biology*  
385 **220**:1341-1349.
- 386 Eto, T., R. Hayashi, Y. Okubo, A. Kashimura, C. Koshimoto, S. H. Sakamoto, and T.  
387 Morita. 2015. Magnitude of food overabundance affects expression of daily torpor.  
388 *Physiology & Behavior* **139**:519-523.
- 389 Ferguson, S. H. 2002. The effects of productivity and seasonality on life history: comparing  
390 age at maturity among moose (*Alces alces*) populations. *Global Ecology &  
391 Biogeography* **11**:303-312.
- 392 Fonturbel, F. E. 2010. A methodological approach to assess the small mammal community  
393 diversity in the temperate rainforest of Patagonia. *Mammalian Biology* **75**:294-301.
- 394 Fonturbel, F. E., M. Franco, M. A. Rodriguez-Cabal, M. D. Rivarola, and G. C. Amico.  
395 2012. Ecological consistency across space: a synthesis of the ecological aspects of  
396 *Dromiciops gliroides* in Argentina and Chile. *Naturwissenschaften* **99**:873-881.

- 397 Franco, M., C. Contreras, P. Cortes, M. A. Chappell, M. Soto-Gamboa, and R. F. Nespolo.  
398 2012. Aerobic power, huddling and the efficiency of torpor in the South American  
399 marsupial, *Dromiciops gliroides*. *Biology Open* **1**:1178-1184.
- 400 Franco, M., A. Quijano, and M. Soto-Gamboa. 2011. Communal nesting, activity patterns,  
401 and population characteristics in the near-threatened monito del monte, *Dromiciops*  
402 *gliroides*. *Journal of Mammalogy* **92**:994-1004.
- 403 French, A. R. 1985. ALLOMETRIES OF THE DURATIONS OF TORPID AND  
404 EUTHERMIC INTERVALS DURING MAMMALIAN HIBERNATION - A TEST  
405 OF THE THEORY OF METABOLIC CONTROL OF THE TIMING OF  
406 CHANGES IN BODY-TEMPERATURE. *Journal of Comparative Physiology B-*  
407 *Biochemical Systemic and Environmental Physiology* **156**:13-19.
- 408 Gao, X., C. N. Jin, D. Llusia, and Y. M. Li. 2015. Temperature-induced shifts in  
409 hibernation behavior in experimental amphibian populations. *Scientific Reports*  
410 **5**:11.
- 411 Geiser, F. 1988. REDUCTION OF METABOLISM DURING HIBERNATION AND  
412 DAILY TORPOR IN MAMMALS AND BIRDS - TEMPERATURE EFFECT OR  
413 PHYSIOLOGICAL INHIBITION. *Journal of Comparative Physiology B-*  
414 *Biochemical Systemic and Environmental Physiology* **158**:25-37.
- 415 Geiser, F. 2004. Metabolic rate and body temperature reduction during hibernation and  
416 daily torpor. *Annual Review of Physiology* **66**:239-274.
- 417 Geiser, F. 2007. Yearlong hibernation in a marsupial mammal. *Naturwissenschaften*  
418 **94**:941-944.
- 419 Geiser, F. 2013. Hibernation. *Current Biology* **23**:R188-R193.
- 420 Geiser, F., and T. Ruf. 1995a. HIBERNATION VERSUS DAILY TORPOR IN  
421 MAMMALS AND BIRDS - PHYSIOLOGICAL VARIABLES AND  
422 CLASSIFICATION OF TORPOR PATTERNS. *Physiological Zoology* **68**:935-  
423 966.
- 424 Geiser, F., and T. Ruf. 1995b. Hibernation versus daily torpor in mammals and birds:  
425 physiological variables and classification of torpor patterns. *Physiological and*  
426 *Biochemical Zoology* **68**:935-966.

- 427 Halekoh, U., and S. Hojsgaard. 2014. Kenward-Roger Approximation and Parametric  
428 Bootstrap Methods for Tests in Linear Mixed Models - The R Package pbkrtest.  
429 Journal of Statistical Software **59**:1-32.
- 430 Hayes, J. P., and T. Garland. 1995. The evolution of endothermy: testing the aerobic  
431 capacity model. Evolution **49**:836-847.
- 432 Hershkovitz, P. 1999. *Dromiciops gliroides* Thomas, 1894, Last of the Microbiotheria  
433 (Marsupialia), with a review of the family Microbiotheridae. Fieldiana **93**:1-60.
- 434 Holloway, J. C., and F. Geiser. 1995. Influence of torpor on daily energy expenditure of the  
435 dasyurid marsupial *Sminthopsis crassicaudata*. Comparative Biochemistry and  
436 Physiology A **112A**:59-66.
- 437 Honorato, M. T., T. A. Altamirano, J. T. Ibarra, M. De la Maza, C. Bonacic, and K. Martin.  
438 2016. Composition and preferences regarding nest materials by cavity-nesting  
439 vertebrates in the Andean temperate forest of Chile. Bosque **37**:485-492.
- 440 Humphries, M. M., D. L. Kramer, and D. W. Thomas. 2003a. The role of energy  
441 availability in mammalian hibernation: An experimental test in free-ranging eastern  
442 chipmunks. Physiological and Biochemical Zoology **76**:180-186.
- 443 Humphries, M. M., D. W. Thomas, and D. L. Kramer. 2003b. The role of energy  
444 availability in mammalian hibernation: A cost-benefit approach. Physiological and  
445 Biochemical Zoology **76**:165-179.
- 446 Humphries, M. M., D. W. Thomas, and J. R. Speakman. 2002. Climate-mediated energetic  
447 constraints on the distribution of hibernating mammals. Nature **418**:313-316.
- 448 Jefimow, M., M. Glabska, and M. S. Wojciechowski. 2011. Social thermoregulation and  
449 torpor in the Siberian hamster. Journal of Experimental Biology **214**:1100-1108.
- 450 Kennedy, A. D. 1995. TEMPERATURE EFFECTS OF PASSIVE GREENHOUSE  
451 APPARATUS IN HIGH-LATITUDE CLIMATE-CHANGE EXPERIMENTS.  
452 Functional Ecology **9**:340-350.
- 453 Konarzewski, M., and J. Diamond. 1995. Evolution of basal metabolic rate and organ  
454 masses in laboratory mice. Evolution **49**:1239-1248.
- 455 Koteja, P. 2004. The evolution of concepts on the evolution of endothermy in birds and  
456 mammals. Physiological and Biochemical Zoology **77**:1043-1050.



- 457 Kurz, M. J., J. D. Drummond, E. Marti, J. P. Zarnetske, J. Lee-Cullin, M. J. Klaar, S.  
458 Folegot, T. Keller, A. S. Ward, J. H. Fleckenstein, T. Datry, D. M. Hannah, and S.  
459 Krause. 2017. Impacts of water level on metabolism and transient storage in  
460 vegetated lowland rivers: Insights from a mesocosm study. *Journal of Geophysical*  
461 *Research-Biogeosciences* **122**:628-644.
- 462 Kusnetzova, A., P. B. Brockhoff, and R. Haubo. 2015. lmerTest: Test in Linear Mixed  
463 Effects Models. . R package version 2.0-25, [http://CRAN.R-](http://CRAN.R-project.org/package=lmerTest)  
464 [project.org/package=lmerTest](http://CRAN.R-project.org/package=lmerTest).
- 465 Le Galliard, J. F., M. Paquet, M. Cisel, and L. Montes-Poloni. 2013. Personality and the  
466 pace-of-life syndrome: variation and selection on exploration, metabolism and  
467 locomotor performances. *Functional Ecology* **27**:136-144.
- 468 Levy, O., T. Dayan, S. Rotics, and N. Kronfeld-Schor. 2012. Foraging sequence, energy  
469 intake and torpor: an individual-based field study of energy balancing in desert  
470 golden spiny mice. *Ecology Letters* **15**:1240-1248.
- 471 Lifson, N., and R. McClintock. 1966. Theory of use of the turnover rates of body water for  
472 measuring energy and material balance. *Journal of Theoretical Biology* **12**:46-74.
- 473 Londono, G. A., M. A. Chappell, M. d. R. Castaneda, J. E. Jankowski, and S. K. Robinson.  
474 2015. Basal metabolism in tropical birds: latitude, altitude, and the 'pace of life'.  
475 *Functional Ecology* **29**:338-346.
- 476 Maugendre, L., J. P. Gattuso, A. J. Poulton, W. Dellisanti, M. Gaubert, C. Guieu, and F.  
477 Gazeau. 2017. No detectable effect of ocean acidification on plankton metabolism  
478 in the NW oligotrophic Mediterranean Sea: Results from two mesocosm studies.  
479 *Estuarine Coastal and Shelf Science* **186**:89-99.
- 480 McKechnie, A. E., R. P. Freckleton, and W. Jetz. 2006. Phenotypic plasticity in the scaling  
481 of avian basal metabolic rate. *Proceedings of the Royal Society B-Biological*  
482 *Sciences* **273**:931-937.
- 483 Merritt, J. F., D. A. Zegers, and L. R. Rose. 2001. Seasonal thermogenesis of southern  
484 flying squirrels (*Glaucomys volans*). *Journal of Mammalogy* **82**:51-64.
- 485 Mitchell, S. E., Z. H. Tang, C. Kerbois, C. Delville, P. Konstantopelos, A. Bruel, D.  
486 Derous, C. Green, R. M. Aspden, S. R. Goodyear, L. N. Chen, J. J. D. Han, Y. C.  
487 Wang, D. E. L. Promislow, D. Lusseau, A. Douglas, and J. R. Speakman. 2015. The

- 488 effects of graded levels of calorie restriction: I. impact of short term calorie and  
489 protein restriction on body composition in the C57BL/6 mouse. *Oncotarget*  
490 **6**:15902-15930.
- 491 Mueller, P., and J. Diamond. 2001. Metabolic rate and environmental productivity: Well-  
492 provisioned animals evolved to run and idle fast. *Proceedings of the National*  
493 *Academy of Sciences of the United States of America* **98**:12550-12554.
- 494 Muñoz-Pedreros, A., B. K. Lang, M. Bretos, and P. L. Meserve. 2005. Reproduction and  
495 development of *Dromiciops gliroides* (Marsupialia: Microbiotheridae) in temperate  
496 rainforests of Southern Chile. *Gayana* **69**:225-233.
- 497 Nagy, J. 2001. Food requirements of wild animals: predictive equations for free-living  
498 mammals, reptiles, and birds. *Nutrition Abstracts and Reviews* **B71**:R21-R31.
- 499 Nagy, K. A. 1983. *The Doubly Labelled Water (3HH18O) Method: a guide to its use.* .  
500 UCLA, Los Angeles, CA.
- 501 Nagy, K. A. 2005. Field metabolic rate and body size. *Journal of Experimental Biology*  
502 **208**:1621-1625.
- 503 Nespolo, R. F., L. D. Bacigalupe, P. A. Sabat, and F. Bozinovic. 2002. Interplay among  
504 energy metabolism, organ masses and digestive enzyme activity in the mouse  
505 opossum, *Thylamys elegans*: the role of thermal acclimation. *Journal of*  
506 *Experimental Biology* **205**:2697-2703.
- 507 Nespolo, R. F., C. Verdugo, P. A. Cortes, and L. D. Bacigalupe. 2010. Bioenergetics of  
508 torpor in the Microbiotherid marsupial, *Monito del Monte* (*Dromiciops gliroides*):  
509 the role of temperature and food availability. *Journal of Comparative Physiology B-*  
510 *Biochemical Systemic and Environmental Physiology* **180**:767-773.
- 511 Nie, Y. G., J. R. Speakman, Q. Wu, C. L. Zhang, Y. B. Hu, M. H. Xia, L. Yan, C. Hambly,  
512 L. Wang, W. Wei, J. G. Zhang, and F. W. Wei. 2015. Exceptionally low daily  
513 energy expenditure in the bamboo-eating giant panda. *Science* **349**:171-174.
- 514 Nowack, J., and F. Geiser. 2016. Friends with benefits: the role of huddling in mixed  
515 groups of torpid and normothermic animals. *Journal of Experimental Biology*  
516 **219**:590-596.

- 517 Pettersen, A. K., C. R. White, and D. J. Marshall. 2016. Metabolic rate covaries with fitness  
518 and the pace of the life history in the field. *Proceedings of the Royal Society B-*  
519 *Biological Sciences* **283**.
- 520 Pough, F. H. 1980. The advantages of ectothermy for tetrapods. *The American Naturalist*  
521 **115**:92-112.
- 522 Ricklefs, R. E., M. Konarzewski, and S. Daan. 1996. The relationship between basal  
523 metabolic rate and daily energy expenditure in birds and mammals. *American*  
524 *Naturalist* **147**:1047-1071.
- 525 Rodriguez-Cabal, M. A., and L. C. Branch. 2011. Influence of habitat factors on the  
526 distribution and abundance of a marsupial seed disperser. *Journal of Mammalogy*  
527 **92**:1245-1252.
- 528 Ruf, T., and F. Geiser. 2015. Daily torpor and hibernation in birds and mammals.  
529 *Biological Reviews* **90**:891-926.
- 530 Ryan, C. C., L. E. Burns, and H. G. Broders. 2019. Changes in underground roosting  
531 patterns to optimize energy conservation in hibernating bats. *Canadian Journal of*  
532 *Zoology* **97**:1064-1070.
- 533 Scharfenberger, U., E. Jeppesen, M. Beklioglu, M. Sondergaard, D. G. Angeler, A. I.  
534 Cakiroglu, S. Drakare, J. Hejzlar, A. Mandy, E. Papastergiadou, M. Sorf, K.  
535 Stefanidis, A. Tuvikene, P. Zingel, and R. Adrian. 2019. Effects of trophic status,  
536 water level, and temperature on shallow lake metabolism and metabolic balance: A  
537 standardized pan-European mesocosm experiment. *Limnology and Oceanography*  
538 **64**:616-631.
- 539 Schmid, J., and J. R. Speakman. 2000. Daily energy expenditure of the grey mouse lemur  
540 (*Microcebus murinus*): a small primate that uses torpor. *Journal of Comparative*  
541 *Physiology B-Biochemical Systemic and Environmental Physiology* **170**:633-641.
- 542 Schmidt-Nielsen, K. 1979. *Animal Physiology: Adaptation and Environment*. Cambridge  
543 University Press, New York.
- 544 Song, X., G. Kortner, and F. Gesier. 2000. Temperature selection and energy expenditure in  
545 the marsupial *Cercartetus nanus*. *Life in the Cold 2000*.
- 546 Speakman, J. R. 1997. *Doubly-labelled water: theory and practice*. Chapman and Hall,  
547 London.

- 548 Team, R. D. C. 2019. A language and environment for statistical computing.
- 549 Van Trigt, R., E. R. T. Kerstel, R. E. M. Neubert, H. A. J. Meijer, M. McLean, and G. H.  
550 Visser. 2002. Validation of the DLW method in Japanese quail at different water  
551 fluxes using laser and IRMS. *Journal of Applied Physiology* **93**:2147-2154.
- 552 Verdier, B., I. Jouanneau, B. Simonnet, C. Rabin, T. J. M. Van Dooren, N. Delpierre, J.  
553 Clobert, L. Abbadie, R. Ferriere, and J. F. Le Galliard. 2014. Climate and  
554 Atmosphere Simulator for Experiments on Ecological Systems in Changing  
555 Environments. *Environmental Science & Technology* **48**:8744-8753.
- 556 Visser, G. H., and H. Schekkerman. 1999. Validation of the doubly labeled water method in  
557 growing precocial birds: The importance of assumptions concerning evaporative  
558 water loss. *Physiological and Biochemical Zoology* **72**:740-749.
- 559 Vuarin, P., and P. Y. Henry. 2014. Field evidence for a proximate role of food shortage in  
560 the regulation of hibernation and daily torpor: a review. *Journal of Comparative*  
561 *Physiology B-Biochemical Systems and Environmental Physiology* **184**:683-697.
- 562 Walsberg, G. E., and B. O. Wolf. 1995. VARIATION IN THE RESPIRATORY  
563 QUOTIENT OF BIRDS AND IMPLICATIONS FOR INDIRECT  
564 CALORIMETRY USING MEASUREMENTS OF CARBON-DIOXIDE  
565 PRODUCTION. *Journal of Experimental Biology* **198**:213-219.
- 566 Wang, L. C. H. 1978. Energetic and field aspects of mammalian torpor: the Richardson's  
567 ground squirrel. *Journal of Thermal Biology* **3**:87.
- 568 Weiner, J. 1992. Physiological limits to sustainable energy budgets in birds and mammals:  
569 ecological implications. *Trends in Ecology and Evolution* **7**:384-388.
- 570 Weir, J. B. D. 1990. NUTRITION METABOLISM CLASSIC - NEW METHODS FOR  
571 CALCULATING METABOLIC-RATE WITH SPECIAL REFERENCE TO  
572 PROTEIN-METABOLISM (REPRINTED FROM JOURNAL PHYSIOL, VOL  
573 109, PG 1-9, 1949). *Nutrition* **6**:213-221.
- 574 White, C. R., and R. S. Seymour. 2003. Mammalian basal metabolic rate is proportional to  
575 body mass  $2/3$  *Proceedings of the National Academy of Science of USA* **100** 4046-  
576 4049.
- 577 Wickham, H. 2016. *ggplot2: elegant graphics for data analysis*. Springer, NewYork.

- 578 Wikelski, M., L. Spinney, W. Schelsky, A. Scheuerlein, and E. Gwinner. 2003. Slow pace  
579 of life in tropical sedentary birds: a common-garden experiment on four stonechat  
580 populations from different latitudes. *Proceedings of the Royal Society of London*  
581 *Series B-Biological Sciences* **online**.
- 582 Wojciechowski, M. S., M. Jefimow, and B. Pinshow. 2011. Heterothermy, and the  
583 Energetic Consequences of Huddling in Small Migrating Passerine Birds.  
584 *Integrative and Comparative Biology* **51**:409-418.
- 585 Wood, S. N. 2011. Fast stable restricted maximum likelihood and marginal likelihood  
586 estimation of semiparametric generalized linear models. *Journal of the Royal*  
587 *Statistical Society Series B-Statistical Methodology* **73**:3-36.
- 588 Zuur, A., E. N. Ieno, N. Walker, A. A. Saveliev, and G. M. Smith. 2009. Mixed effects  
589 models and extensions in ecology with R. Springer, New York.
- 590

591 **Figure Captions**

592

593 Fig 1a) Digital photographs and thermographs of clustered hibernating *D. gliroides*, at  
594 different cluster sizes. The average temperature of each picture is 10°C, approximately. b)  
595 Photographs of the enclosures (c), enclosure opening showing the reproduced forest  
596 environment, (d) female *Dromiciops* within the enclosure, (e) a male with the food feeders,  
597 (f) a cluster of hibernating animals after removing the hibernaculum, (g) a close-up of a  
598 cluster of 5 hibernating animals (h) a torpid female of the control treatment. Red arrows  
599 indicate the moment of daily energy expenditure and basal metabolic rate measurements.

600

601 Fig 2. a) Weekly body masses (mean±sem) of individuals of *D. gliroides* either receiving  
602 food ad libitum or exposed daily to a chronic energetic restriction, CCR, since week 0 (April,  
603 15<sup>th</sup>, autumn), in a semi-natural experiment (enclosures). Comparisons between CCR (n=15)  
604 and control (n=22) individuals were significant between week 20 and week 25 (t-tests,  
605  $p<0.05$ ); b) Per-capita energy consumption (dry mass) showing control (offered: 165 kJ ind<sup>-1</sup>  
606 day<sup>-1</sup>) and CCR (offered: 95 =kJ ind<sup>-1</sup> day<sup>-1</sup>; indicated by horizontal dotted lines); c) Torpor  
607 incidence in CCR and control individuals (bars) and weekly minimum ambient temperature  
608 (line).

609

610 Fig 3. Daily energy intake estimated from food consumption in function of air temperature  
611 during the experimental period.

612

613 Fig 4. a) Daily energy expenditure (DEE) in summer and winter *D. gliroides* under the CCR  
614 and control conditions; b) basal metabolic rate; c) DEE aerobic scope; d) body masses, e)  
615 scaling of summer animals for both CCR and control groups pooled; d) scaling of winter  
616 animals. Significance ( $P<0.05$ ) is denoted after a repeated measures ANOVA.

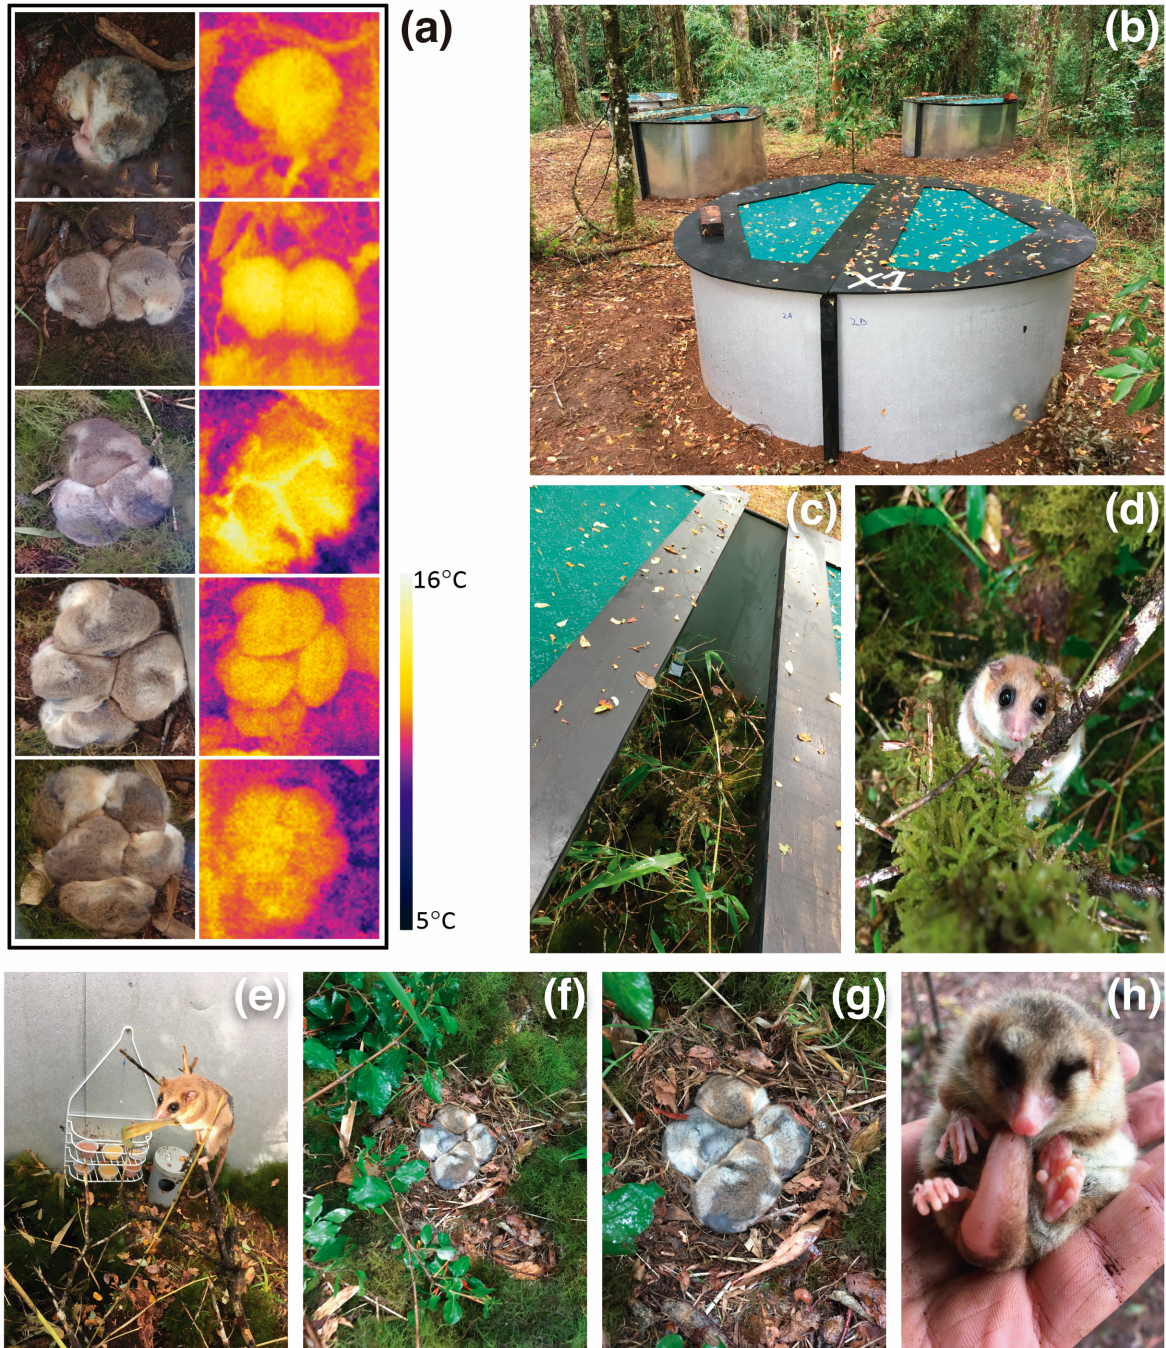

617  
618  
619

Fig 1. Nespolo et al.

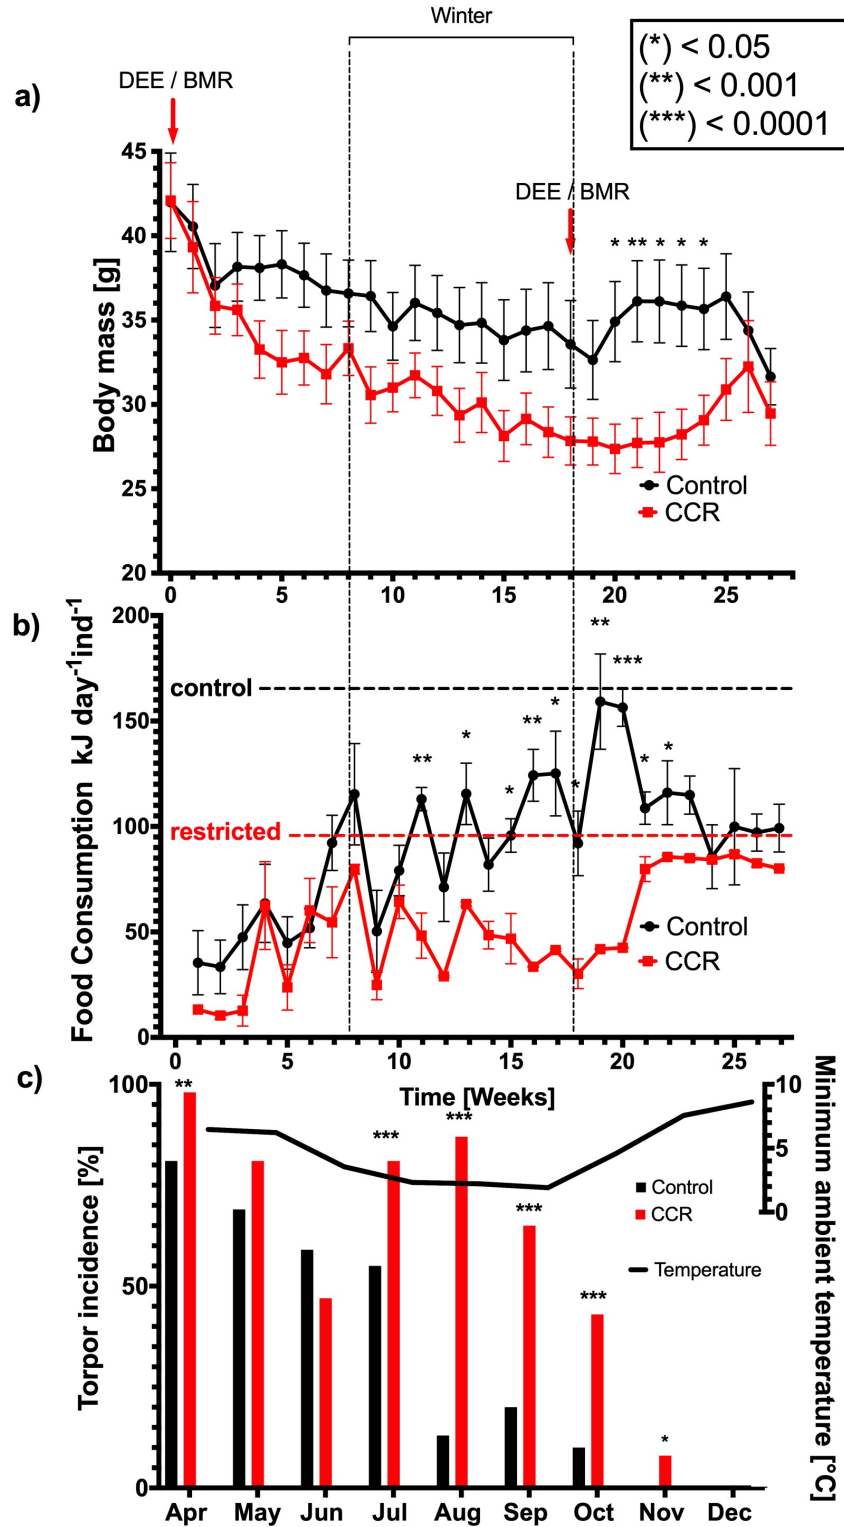

620

621

622

Fig 2. Nespolo et al.



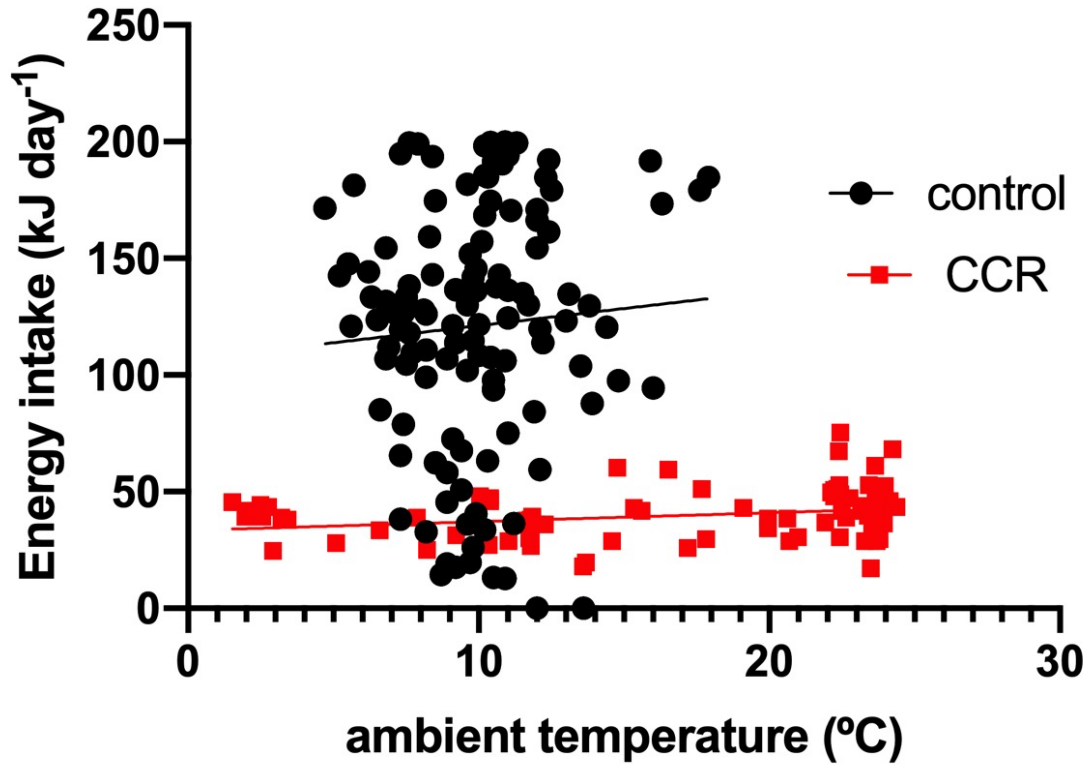

623  
624  
625  
626  
627

Fig 3. Nespolo et al.

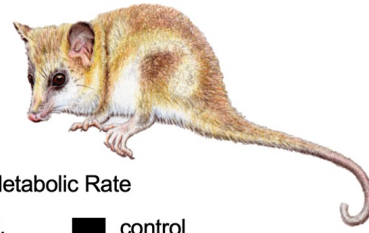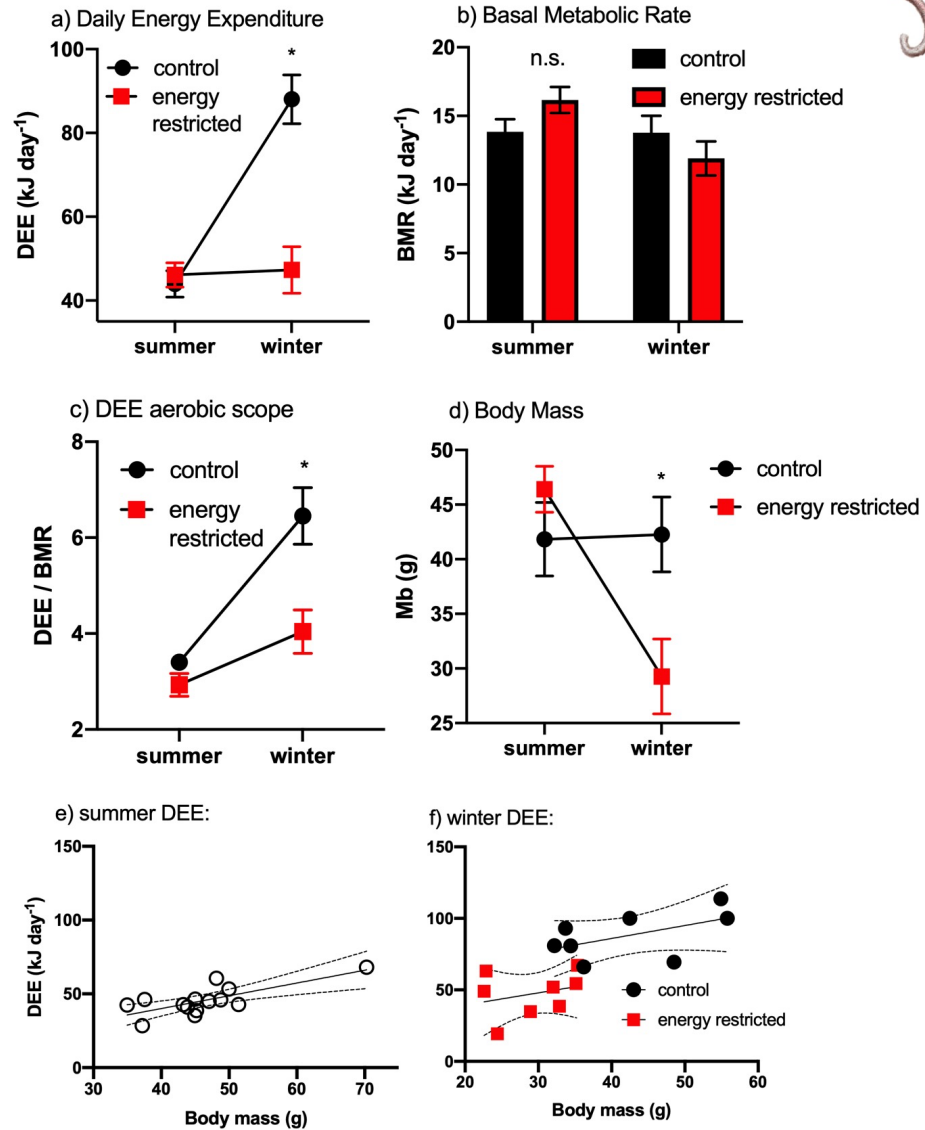

628

629

630

Fig 4. Nespolo et al.

631 *Supplementary Material*

632

633 **A mesocosm experiment in ecological physiology: adaptive modulation of energy**  
634 **budget in a hibernating marsupial under chronic caloric restriction**

635

636 Roberto F. Nespolo, Francisco E. Fontúrbel, Carlos Mejias, Rodrigo Contreras, Paulina  
637 Gutierrez, José Ruiz, Esteban Oda, Pablo Sabat, Catherine Hambly, John R. Speakman &  
638 Francisco Bozinovic

639

640 *Supplementary Material and Methods*

641

642 *Enclosures*

643 Each enclosure had a internal volume of 2 m<sup>3</sup>, and was manufactured in zinc by a large 1.8-  
644 diameter cylinder buried 10 cm in the ground, which gave a 0.8 m height above ground.  
645 Each ceiling was framed in timber, and had a mesh that allowed the entrance of light and  
646 humidity, but avoided the escape of the animals or predator's attack. Then we included a  
647 tri-dimensional arrangement of *Nothofagus* twigs and logs, native bamboo (*Chusquea*  
648 *quilla*) in each enclosure, and the floor was covered by mosses and bamboo leaves, which  
649 are known to be essential for *D. gliroides* nests building (Hershkovitz 1999, Honorato et al.  
650 2016), resembling forest conditions (see Fig 1b-d in main text). We also included one  
651 removable hibernaculum per enclosure, which consisted in a hollowed log of about  
652 30x10x15 cm, cut longitudinally that was put over the ground in a way that allowed  
653 animals to enter, cluster, rest, or hibernate. Each hibernaculum was sealed at each end by a  
654 timber cover with a small hole in the middle, to allow animal entrance. In each enclosure,  
655 we also put one max/min thermometer, one temperature data logger (HOBO®) for  
656 continuous T°C recording and water ad libitum.

657

658 *Diet preparations*

659 *D. gliroides* is an omnivorous marsupial with well-known dietary preferences (Cortes et al.  
660 2011, Rodriguez-Cabal and Branch 2011, Contreras et al. 2014), thus we offered three  
661 dietary items to them in separate plates: apple compote, canned tuna (in water) and blend  
662 (i.e., equal parts mix between berry jam and baby cereals plus 50% of water) (Contreras et  
663 al. 2014))(see Fig 1e in main text). We also added a polyvitamin mixture in the diets (0.3  
664 mg kg<sup>-1</sup> invade®). The apple compote and the tuna were offered as they are obtained from  
665 the commercial suppliers. We always used the same commercial suppliers. Three samples  
666 of each diet were dried and calorimetrically analyzed in a Parr calorimeter (Illinois, USA),  
667 showing similar energy contents (dry weight)(tuna: 23.04 ± 3.4 kJg<sup>-1</sup>; blend: 17.90 ± 0.12  
668 kJg<sup>-1</sup>; apple compote: 15.89 ± 0.48 kJg<sup>-1</sup>)(see details in Table S1). We calculated food  
669 consumption using marsupial allometric equations (Nagy 2001) and considering a  
670 maximum energy expenditure that is six times basal metabolic rate (Bozinovic et al. 2004,  
671 Nespolo et al. 2010, Franco et al. 2012).

672

673 *Table S1. Nutrient content of the experimental diets provided to the enclosures. Each*  
674 *enclosure received three dietary items: (1) a homogenized blend of jam and cereal diluted*  
675 *in 50% water, (2) a weighed amount of tuna and (3) a weighed amount of apple compote*  
676 *from a commercial supply (see methods for details).*  
677

| <b>Commercial label</b> | <b>Jam</b> | <b>Cereal</b> | <b>Canned<br/>tuna</b> | <b>Apple<br/>compote</b> |
|-------------------------|------------|---------------|------------------------|--------------------------|
| Calories (KJ/100g)      | 887        | 1,564.8       | 280.3                  | 281.2                    |
| Protein (%)             | 0.3        | 9             | 15                     | 0.3                      |
| Total fat (%)           | 0.2        | 1.8           | 0.4                    | 0.3                      |
| Total Carbohydrate (%)  | 52.2       | 80.5          | 0.5                    | 16                       |
| Total sugars (%)        | 51.7       | 26.0          | 0.5                    | 16                       |
| Sodium (mg/100g)        | 13         | 80            | 314                    | 4                        |

678  
679

680 *Thermographic imaging*

681 For characterizing thermoregulatory abilities of hibernating *D. gliroides*, we visited the  
682 enclosures every week, uncovered each hibernaculum, took a digital photo and an infra-red  
683 photograph of clustered torpid individuals using a thermograph (FLIR systems, Oregon,  
684 USA) set for an emissivity of 0.98 (Fig. 1f-g, total images: 328). This infrared imaging  
685 permitted us to measure in situ external body temperatures ( $T_{TORPID}$ ), by averaging the  
686 temperature of a polygon drawn of the image of each animal using the FLIR tools software.  
687 We also measured the mean temperature of the substrate 10 cm apart of the cluster  
688 ( $T_{SUBSTR}$ ). With this information, we calculated the thermal differential ( $T_{DIFF} = T_{TORPID} -$   
689  $T_{SUBSTR}$ ) for each animal, which is a measure of heat conservation in torpor. After recording  
690 these images, we measured cloacal temperature on each animal, using a Cole-Parmer  
691 copper-constantan thermocouple inserted 1 cm in the cloaca. This record was obtained  
692 within a few minutes after taking the images (otherwise it was discarded). Cloacal  
693 temperature was correlated with  $T_{TORPID}$  ( $R^2 = 0.68$ ;  $P < 0.01$ ; Fig. S1,  $n = 410$ ). Finally,  
694 each torpid animal was weighed and released back in the hibernaculum. We also recorded  
695 the size of the cluster and whether they were found within the hibernaculum. We also  
696 classified each animal as torpid or active by visual inspection (see Fig 1h in main text).

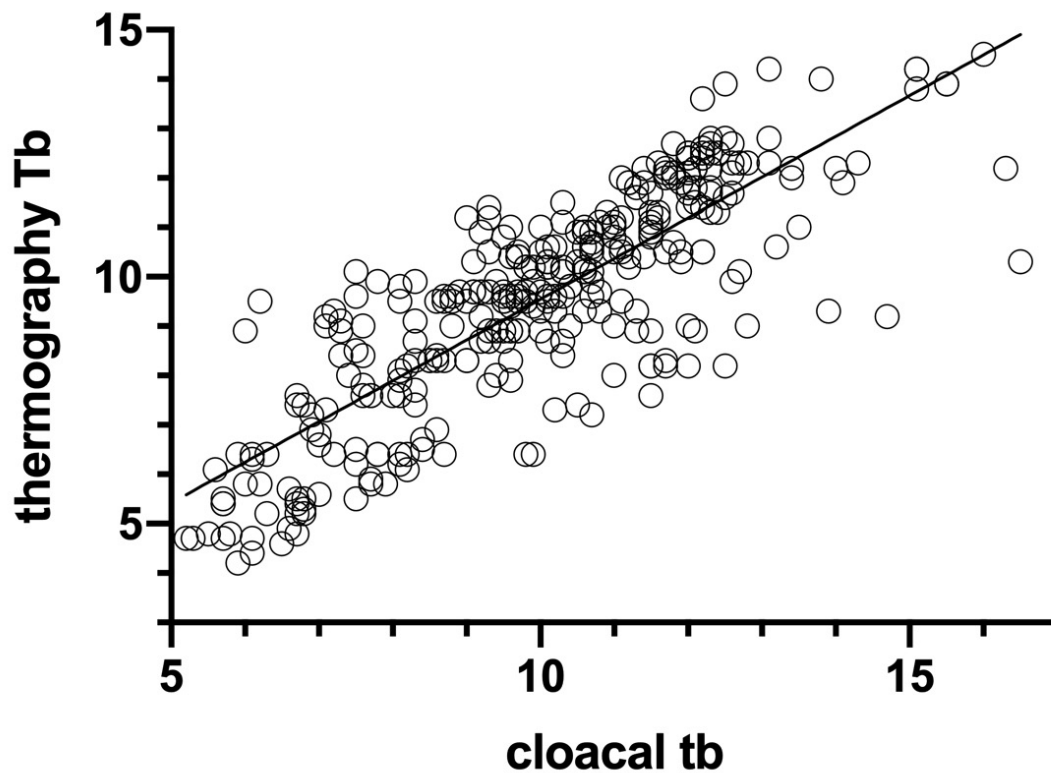

697

698 *Fig S1. Bivariate relationship between surface skin temperature measured by*  
699 *thermographic images and cloacal temperature, measured by a copper-constantan*  
700 *thermocouple, in each animal.*

701

702 *Doubly labelled water*

703 This method has been previously validated by comparison to indirect calorimetry in a range  
704 of small mammals (e.g. Speakman and Krol, 2005). A weighed amount of DLW was injected  
705 intraperitoneally into each individual. A blood sample (100ul) was collected from the tail  
706 vein into glass capillaries and flame sealed 1 and 48 hours later. Background samples were  
707 collected from some individuals prior to dosing. Analysis of the isotopic enrichment of blood  
708 was performed blind using a Liquid Isotope Water Analyser (Los Gatos Research, USA)  
709 (Berman et al. 2012). Initially the blood encapsulated in the capillaries was vacuum distilled  
710 (Nagy 1983), and the resulting distillate was used. Samples were run alongside three lab  
711 standards for each isotope and International standards to correct delta values to ppm.  
712 Equation 7.17 of Speakman (1997)(Speakman 1997) assuming a single-pool model was used  
713 to calculate rates of CO<sub>2</sub> production as recommended for use in animals less than 1 kg in  
714 body mass (Speakman 1997). There are several approaches for the treatment of evaporative  
715 water loss in the calculation (Visser and Schekkerman 1999). We assumed evaporation of  
716 25% of the water flux (equation 7.17: Speakman 1997) which minimizes error in a range of  
717 conditions (Visser and Schekkerman 1999, Van Trigt et al. 2002). CO<sub>2</sub> production was  
718 converted to DEE using the Weir equation (Weir 1990).

719

720 *Basal metabolic rate*

721 Briefly, metabolic rate was recorded using a LiCor 6251 CO<sub>2</sub> analyzer in a 1L metabolic  
722 chamber and a flow rate of 1,000 ml min<sup>-1</sup>, after scrubbing water and CO<sub>2</sub> from the incoming  
723 air. The metabolic chamber was located in an incubator, and ambient temperature was set to  
724 thermoneutrality (30°C) which was continuously recorded by a thermocouple located inside  
725 the incubator. These measurements were completed after a day of acclimation to the  
726 laboratory and after food had been removed for 8 hrs. Metabolic trials all took place during  
727 the typical rest phase of the animals (between 8am and 7pm). Each measurement had a  
728 duration of three hours and most animals slept after the first hour in the chamber, which was  
729 checked by visual inspection through a small window in the incubator. BMR (mlCO<sub>2</sub> h<sup>-1</sup>) was  
730 calculated from the three lowest steady-state values during the last 30 min of recording, and  
731 converted to kJ assuming an RQ=0.71 (Walsberg and Wolf 1995).

732

733 *Statistical analyses*

734 We fitted Mixed-Effects Generalized Linear Models (GLMM) with a gaussian error  
735 distribution and an 'identity' link function on the previously defined variables. We included  
736 individual ID, enclosure, and sampling week as random effects to account for inter-  
737 individual and inter-enclosure variability, along with the repeated measures in time (Zuur et  
738 al. 2009). To estimate the best explanatory variables for torpor occurrence, we fitted a  
739 GLMM with a binomial error distribution and a 'logit' link function (Beckerman et al.  
740 2017), including treatment, body mass, and group size as predictors (fixed effects) and  
741 individual ID, enclosure and sampling week as random effects, as described above. To  
742 explore the factors that influence heat conservation in torpid animals, we fitted additional  
743 models using the same parameters on a subset of data of torpid animals. Then, we fitted one  
744 more GLMM to assess the factors determining  $T_{DIFF}$ , using CCR treatment, body mass, and  
745 group size as predictors (fixed effects) and individual ID, enclosure and sampling week as  
746 random effects, as previously described. We estimated GLMM parameters and their  
747 significance using a restricted maximum likelihood approach with a Kenward-Roger  
748 approximation to estimate degrees of freedom (Halekoh and Hojsgaard 2014). We

749 performed all analyses using R 3.6.0 (Team 2019), with the packages mgcv (Wood 2011),  
750 lme4 (Bates et al. 2013), lmerTest (Kuznetsova et al. 2015), pbkrtest (Halekoh and  
751 Hojsgaard 2014), and ggplot2 (Wickham 2016).

752

### 753 **Supplementary Results**

#### 754 *Thermoregulation during torpor*

755 As soon as ambient temperature fell below  $\sim 12^{\circ}\text{C}$ , we observed packed clusters of torpid  
756 animals, sometimes within a compact nest of interwoven leaves of native bamboo  
757 (*Chusquea quila*) and mosses, or sometimes just buried in the ground. However,  
758 thermoregulatory adjustments during hibernation between CCR and control animals were  
759 not different, as revealed by thermographic images (summarized in Fig. S2 and Table S2,  
760  $n=328$ ), and by the frequency of clustering or hibernacula use (summarized in Fig. S3,  
761  $n=530$  and  $618$ , respectively). Although the GLMM model using torpor occurrence as a  
762 binomial variable showed several significant effects of the CCR treatment, indicating  
763 complex interaction among food deprivation, cluster size and body mass (Table S2), there  
764 were non-significant effects of these variables on the thermal differential between animals  
765 and substrate, estimated by the analysis of  $T_{DIFF}$  (Table S3). Thermoregulatory variables  
766 such as the  $T_B/T_A$  slope comparison between control and CCR (Fig. S2a-c) and the  
767 comparison of slopes of the logistic regression of torpid and active animals (Fig. S2d;  
768  $n=795$  and  $342$ , control and CCR respectively) were non-significant. Also, the most  
769 frequent substrate temperature for torpor in control individuals (median= $10.05$ , min= $4.8$ ,  
770 max= $16.2^{\circ}\text{C}$ ,  $n=130$ ) was nearly identical with CCR individuals (median= $10.1$ , min= $4.2$ ,  
771 max= $15.9^{\circ}\text{C}$ ,  $n=148$ , Fig. S2e-f, non-significant differences after a median test). Behavioral  
772 strategies for heat conservation such as clustering (control animals formed small groups  
773 during torpor, whereas CCR animals did not show any trend, Fig. S3a-b), and hibernacula  
774 use (control animals were preferably found within hibernacula, both active and torpid, Fig.  
775 S3c-d) indicated absence of behavioral strategies for heat conservation in CCR. In other  
776 words, ad libitum fed animals preferred hibernacula irrespectively of being active or torpid.  
777

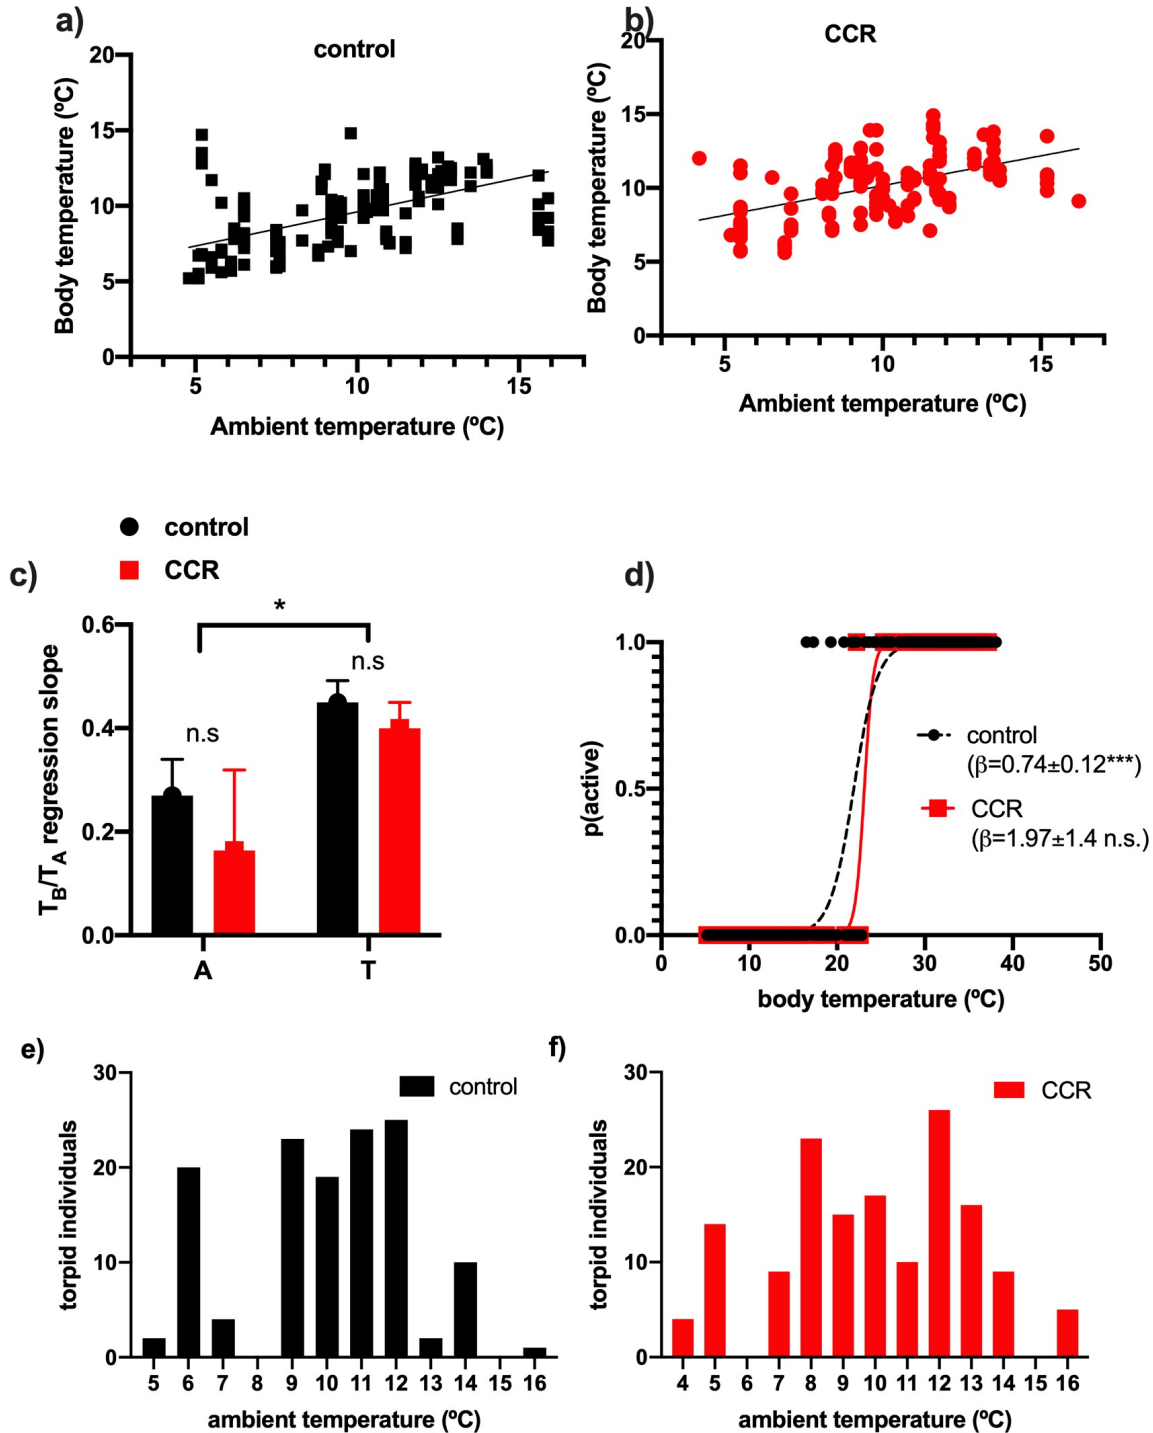

778

779

780 *Fig S2. Thermal physiology of D. gliroides under control and energy restricted conditions.*  
 781 *Linear regressions (a: control; b: treatment) between ambient temperature and body*  
 782 *temperature measured weekly as cloacal temperature in a semi-natural experiment of*  
 783 *chronic caloric restriction. Figure S2c shows a comparison of the  $T_A/T_B$  slopes (A: active;*  
 784 *B: torpid) calculated above, showing significant differences only for torpid and active*  
 785 *individuals: comparisons either within control ( $F_{1,263}=19.9$ ;  $P=0.018$ ; ANCOVA*



786 homogeneity of slopes model) or within energy restricted animals ( $F_{1,387}=19.7$ ;  $P=0.018$ ;  
 787 ANCOVA homogeneity of slopes model). Non-significant differences were found for  
 788 control/treatment comparisons within torpid or within active animals (indicated). Figure  
 789 S2d) logistic regression between body temperature and probability of being active, showing  
 790 a rewarming threshold in  $T_B$  of about  $22^\circ\text{C}$ , but it was non-significant for energy restricted  
 791 animals. Figure S2e and f) shows substrate preferred temperatures in control and energy  
 792 restricted individuals. Both distributions have identical medians ( $=10.1^\circ\text{C}$ ).  
 793

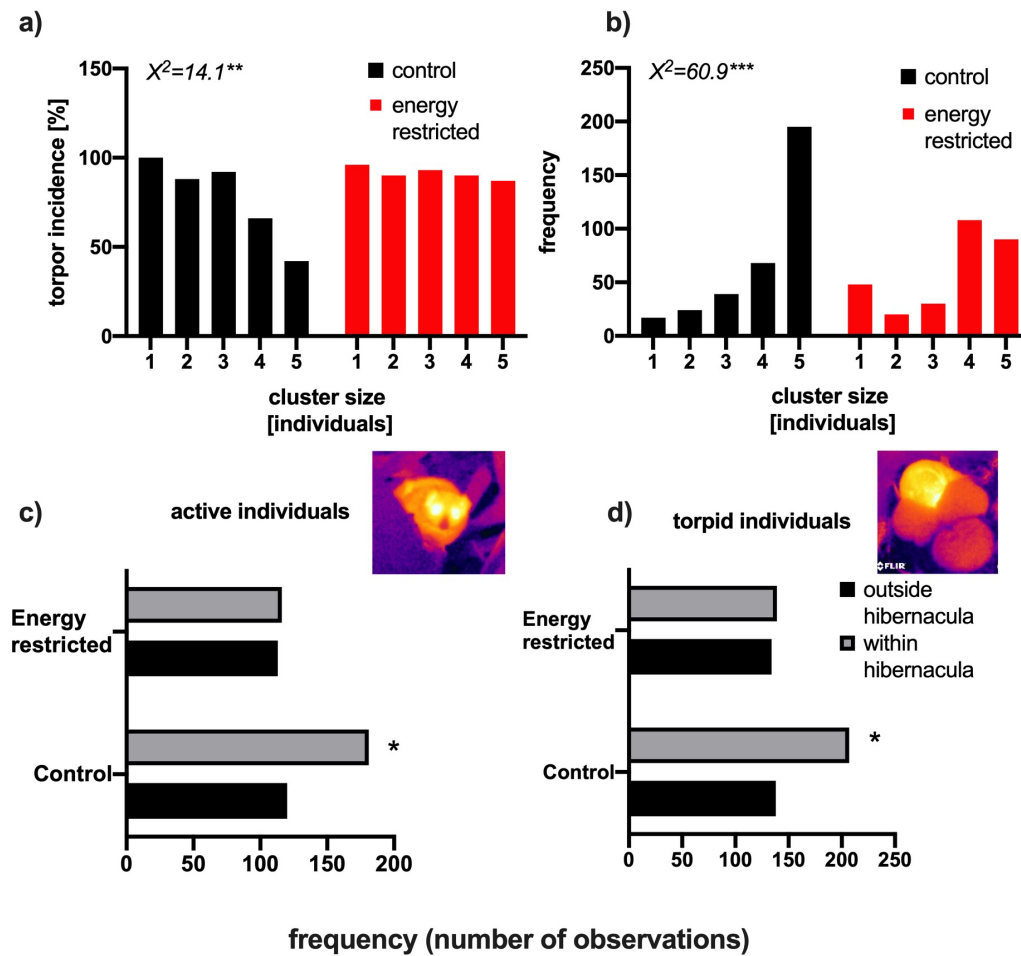

794  
 795  
 796

797 Fig S3. Frequency distributions of animals forming groups or using hibernacula during the  
 798 CCR experiment. a) torpor incidence in function of cluster size; b) total frequency of cluster  
 799 size; c) hibernacula use in active animals and d) hibernacula use in torpid animals.  
 800 Significant values indicating different frequencies across categories, are indicated after a  
 801 chi-square contingency table (indicated in the figure) and Fisher exact test ( $*P<0.001$ ).

802 *Table S2. Results of a generalized linear mixed model fit by restricted maximum likelihood,*  
 803 *for the binomial response variable “status” (active/torpid) using the logit link (n= 795). The*  
 804 *model was: status ~ treatment (restricted/control) + body mass ( $M_B$ ) + cluster size (1-5*  
 805 *individuals) + enclosure (random factor) + ID (random factor) + week (random factor). The*  
 806 *model included all possible interactions.*  
 807

| Variable                      | Estimate | SE    | z-value | P-value |
|-------------------------------|----------|-------|---------|---------|
| (Intercept)                   | 10.220   | 4.169 | 2.451   | 0.014   |
| caloric restriction treatment | -21.469  | 6.640 | -3.234  | 0.001   |
| mass                          | -0.485   | 0.134 | -3.621  | <0.001  |
| group.size                    | -1.889   | 0.842 | -2.243  | 0.025   |
| dietTreatment:mass            | 0.652    | 0.202 | 3.225   | 0.001   |
| dietTreatment:group.size      | 3.092    | 1.468 | 2.106   | 0.035   |
| mass:group.size               | 0.091    | 0.027 | 3.301   | 0.001   |
| dietTreatment:mass:group.size | -0.114   | 0.046 | -2.496  | 0.013   |

808  
 809  
 810  
 811  
 812  
 813  
 814  
 815  
 816  
 817

*Table S3. Results of a generalized linear mixed model fit by restricted maximum likelihood,*  
*for the response variable “ $T_{DIFF}$ ” (thermal differential), obtained using thermographic*  
*pictures in clustered hibernating animals (n= 328). The model was:  $T_{DIFF}$  ~ treatment*  
*(restricted/control) + body mass ( $M_B$ ) + cluster size (1-5 individuals) + enclosure (random*  
*factor) + ID (random factor) + week (random factor). The model included all possible*  
*interactions.*

| Variable      | Estimate   | SE        | df        | t-value | Pr(> t )  |
|---------------|------------|-----------|-----------|---------|-----------|
| (Intercept)   | 5.840e-01  | 1.898e-01 | 8.272e+01 | 3.077   | 0.00283** |
| dietTreatment | -1.676e-02 | 6.980e-02 | 6.183e+00 | -0.240  | 0.81804   |
| mass          | -2.189e-04 | 4.004e-03 | 6.031e+01 | -0.055  | 0.95658   |
| group.size    | 2.508e-02  | 2.456e-02 | 2.688e+02 | 1.021   | 0.30809   |

Signif. codes: 0 ‘\*\*\*’ 0.001 ‘\*\*’ 0.01 ‘\*’ 0.05 ‘.’ 0.1 ‘ ’ 1

818
